# Supplementary material for: Foraging Habits of Green Sea Turtles (Chelonia mydas) in the Northwestern Gulf of Mexico
Source: Frontiers journal article supplement (doi:10.3389/fmars.2021.658368), 2021-04-15
Supplement: Table_1.XLSX [file Table_1.XLSX]

## Sheet: Header
The following supplementary material accompanies the article
Foraging Habits of Green Sea Turtles (Chelonia mydas) in the Northwestern Gulf of Mexico
Lyndsey N. Howell1* and Donna J. Shaver2
1NOAA National Marine Fisheries Service, Office of Protected Resources, Pascagoula, MS, USA
2National Park Service, Division of Sea Turtle Science and Recovery, Padre Island National Seashore, Corpus Christi, TX, USA
*Email: Lyndsey.Howell@noaa.gov

## Sheet: Table S1
Table S1. Frequency of occurrence (F), percent weight by individual (Wi) and percent index of relative importance (IRI) for all diet items from 420 green turtles salvaged from the Texas coast during 1987-2014. Dash symbols represent the absence of data for one or more species within the respective size class.
Size class, straight carapace length (cm)	Oceanic (≤ 20.0 cm)							Recruit (20.1–30.0 cm)							Transitional (30.1–40.0 cm)							Inshore (≥ 40.1 cm)
Diet item	F (%)	Wi (%), mean	SD (%)	Wi (%), range			IRI (%)	F (%)	Wi (%), mean	SD (%)	Wi (%), range			IRI (%)	F (%)	Wi (%), mean	SD (%)	Wi (%), range			IRI (%)	F (%)	Wi (%), mean	SD (%)	Wi (%), range			IRI (%)
Seagrasses
Cymodocea filiformis	-	-	-		-		-	13.8462	5.47452	18.7097	0	–	87.5	4.0228	24.1758	9.04887	25.2061	0	–	100	8.35558	33.3333	8.36892	21.5825	0	–	98.0769	8.42327
Halodule beaudettei	13.3	9.2	24.9	0	–	83.5	3.14971	33.0769	5.16248	17.9136	0	–	99.4894	8.85152	44.5055	9.73448	24.6273	0	–	100	16.7516	51.6129	15.8192	30.2554	0	–	100	24.6533
Halophila engelmannii	-	-	-		-		-	7.69231	0.619415	5.83373	0	–	65.4478	0.252867	14.2857	3.86773	15.9334	0	–	92.3077	2.11037	33.3333	7.62681	21.9502	0	–	94.8845	7.67633
Ruppia maritima	-	-	-		-		-	9.23077	0.371036	2.90556	0	–	31.2581	0.166617	7.69231	0.0230678	0.111477	0	–	1.03479	0.00726152	16.129	0.52779	3.5459	0	–	33.8144	0.257041
Thalassia testudinum	6.7	0.35461	0.0884553	0	–	0.35461	0.0041836	38.4615	4.04123	14.586	0	–	99.9458	8.24885	43.956	12.6913	28.5654	0	–	100	21.3071	62.3656	21.5985	35.9754	0	–	100	39.9712
Unidentified Seagrass	-	-	-		-		-	8.46154	2.02592	11.7023	0	–	85.3229	0.413525	20.8791	6.6331	19.0983	0	–	96.1239	2.64484	15.0538	7.37878	21.1553	0	–	94.7316	2.63528
Green Algae
Acetabularia spp.	-	-	-		-		-	-	-	-		-		-	-	-	-		-		-	2.15054	0.000646493	0.00564336	0	–	0.0542299	4.19801e-05
Bryopsis pennata	-	-	-		-		-	1.53846	0.0547964	0.570229	0	–	6.46838	0.00447396	0.549451	0.0707198	0.954062	0	–	14.2038	0.00148412	-	-	-		-		-
Caulerpa mexicana	-	-	-		-		-	-	-	-		-		-	-	-	-		-		-	2.15054	0.266476	2.52203	0	–	24.3243	0.0173036
Chaetomorpha gracilis	-	-	-		-		-	2.30769	0.0206583	0.188424	0	–	2.10526	0.00253003	0.549451	3.4344e-05	0.000463326	0	–	0.00628496	7.20744e-07	4.30108	0.00220631	0.0184876	0	–	0.177686	0.000286533
Cladophora albida	-	-	-		-		-	2.30769	0.159931	1.76116	0	–	20	0.0195868	0.549451	0.000295825	0.0039909	0	–	0.054136	6.20818e-06	2.15054	0.0166698	0.112112	0	–	0.821196	0.00108246
Cladophora montagneana	-	-	-		-		-	1.53846	0.277113	3.14709	0	–	40.729	0.0226255	-	-	-		-		-	-	-	-		-		-
Cladophora spp.	6.66667	0.6	1.70407	0	–	6.83147	0.102737	6.92308	0.809901	8.73294	0	–	99.9294	0.264504	3.84615	0.00297622	0.0230451	0	–	0.28399	0.000499671	3.22581	1.02361	9.75651	0	–	94.5152	0.0997026
Codium taylorii	-	-	-		-		-	0.775194	0.775194	8.73678	0	–	100	0.0316461	2.1978	0.36944	4.91447	0	–	66.6667	0.0310123	-	-	-		-		-
Ulva spp.	-	-	-		-		-	23.0769	1.24231	6.19105	0	–	56.9948	1.47074	14.2857	1.06415	6.98618	0	–	74.3266	0.602969	13.9785	2.25966	12.3011	0	–	99.746	0.953752
Ulva clathrata	-	-	-		-		-	-	-	-		-		-	1.0989	0.00406014	0.0402716	0	–	0.540394	0.000170412	-	-	-		-		-
Ulva fasciata	-	-	-		-		-	6.92308	1.15707	6.95304	0	–	66.6667	0.42512	3.84615	0.392764	4.73225	0	–	64	0.0576978	4.30108	0.320954	1.83121	0	–	14.7573	0.0416823
Ulva flexuosa	-	-	-		-		-	-	-	-		-		-	0.549451	0.000956165	0.0128994	0	–	0.184162	2.00661e-05	-	-	-		-		-
Ulva lactuca	-	-	-		-		-	10.7692	1.68304	7.1327	0	–	50	0.961908	3.84615	0.271791	1.98162	0	–	21.5827	0.0399266	3.22581	0.020191	0.154734	0	–	1.47059	0.00196666
Red Algae
Agardhiella subulata	-	-	-		-		-	2.30769	0.102684	1.01058	0	–	10.8937	0.0125758	2.1978	0.0103493	0.0922124	0	–	1.15967	0.000868763	-	-	-		-		-
Aglaothamnion halliae	-	-	-		-		-	0.769231	0.00512243	0.057732	0	–	0.660793	0.000209115	-	-	-		-		-	-	-	-		-		-
Amphiroa fragilissima	-	-	-		-		-	-	-	-		-		-	0.549451	0.00386906	0.0521965	0	–	0.708038	8.1196e-05	-	-	-		-		-
Bryocladia cuspidata	-	-	-		-		-	2.30769	0.174181	1.93893	0	–	22.1935	0.0142213	1.64835	0.00327834	0.0382773	0	–	0.516796	0.000275196	-	-	-		-		-
Bryocladia spp.	-	-	-		-		-	3.84615	0.0542334	0.408195	0	–	4.27559	0.01107	0.549451	0.00216292	0.0291793	0	–	0.399729	4.53909e-05	3.22581	0.0113471	0.0941341	0	–	0.89971	0.00110524
Caloglossa leprieurii	-	-	-		-		-	-	-	-		-		-	0.549451	0.00224309	0.0302609	0	–	0.41049	4.70734e-05	-	-	-		-		-
Centroceras clavulatum	-	-	-		-		-	0.769231	0.000280664	0.00386241	0	–	0.0442087	1.14577e-05	0.549451	9.19528e-06	0.000124051	0	–	0.00168279	1.92972e-07	1.07527	0.000159558	0.00152209	0	–	0.0146836	5.18046e-06
Ceramium subtile	-	-	-		-		-	0.769231	0.143554	1.61792	0	–	18.5185	0.00586039	-	-	-		-		-	-	-	-		-		-
Champia parvula	-	-	-		-		-	-	-	-		-		-	0.549451	9.19528e-05	0.00124051	0	–	0.0168279	1.92972e-06	1.07527	0.000768928	0.0073351	0	–	0.0707414	2.49652e-05
Chondria sp.	-	-	-		-		-	1.53846	0.0262476	0.285044	0	–	3.26093	0.00214303	0.549451	0.000887475	0.0119727	0	–	0.162408	1.86245e-05	3.22581	0.0134113	0.0954246	0	–	0.851651	0.00130629
Digenea simplex	-	-	-		-		-	6.92308	0.44288	2.7063	0	–	35.0575	0.162719	2.1978	0.35009	4.68055	0	–	63.4921	0.0293879	3.22581	0.0868234	0.594242	0	–	8.32958	0.00845683
Erythrotrichia carnea	-	-	-		-		-	-	-	-		-		-	0.549451	2.50871e-05	0.000338444	0	–	0.00459095	5.26478e-07	1.07527	0.00336832	0.0321317	0	–	0.309885	0.000109361
Gelidium corneum	-	-	-		-		-	3.84615	1.50397	9.75208	0	–	91.3793	0.306987	3.2967	1.20229	9.07795	0	–	100	0.151387	-	-	-		-		-
Gelidium crinale	13.3333	0.8	1.8	0	–	4.10959	0.140812	23.8462	14.6069	31.7276	0	–	100	18.4854	39.011	24.3634	37.8128	0	–	100	36.3016	15.0538	8.87186	25.4323	0	–	99.5342	4.03267
Gelidium pusillum	-	-	-		-		-	0.769231	0.599189	6.80548	0	–	78.5733	0.024461	-	-	-		-		-	-	-	-		-		-
Gelidium spp.	-	-	-		-		-	0.769231	0.728689	8.27632	0	–	94.1987	0.0297476	2.1978	0.829936	8.10206	0	–	94.7817	0.0696681	4.30108	0.368186	2.69431	0	–	24.2718	0.0478164
Gracilaria cervicornis	-	-	-		-		-	0.769231	0.0401655	0.452683	0	–	5.18135	0.00163969	-	-	-		-		-	-	-	-		-		-
Gracilaria tikvahiae	-	-	-		-		-	13.8462	1.89115	8.87222	0	–	83.3333	1.38966	10.989	1.51237	9.19872	0	–	98.2143	0.634772	9.67742	1.20508	9.9756	0	–	96.0983	0.352134
Grateloupia filicina	-	-	-		-		-	10.7692	3.4466	14.2481	0	–	93.75	1.96983	4.94505	1.08703	8.35384	0	–	99.6219	0.205311	2.15054	0.00591563	0.043281	0	–	0.389343	0.000384132
Grateloupia pterocladina	-	-	-		-		-	2.30769	0.177162	1.48919	0	–	15.5702	0.0216972	5.49451	1.16557	7.63815	0	–	76.6625	0.244606	4.30108	0.0523958	0.398636	0	–	3.81212	0.00680466
Halimeda incrassata	-	-	-		-		-	-	-	-		-		-	0.549451	0.0260213	0.351047	0	–	4.7619	0.000546083	1.07527	0.000868176	0.00828187	0	–	0.0798722	2.81876e-05
Halymenia floridana	-	-	-		-		-	0.769231	0.0130182	0.146721	0	–	1.67935	0.00053145	0.549451	0.537843	7.25589	0	–	98.4252	0.0112872	-	-	-		-		-
Hydropuntia caudata	-	-	-		-		-	2.30769	0.177412	1.37192	0	–	13.3333	0.0217277	9.89011	0.667171	3.86304	0	–	45.4545	0.252022	16.129	2.80318	13.2689	0	–	100	1.36519
Hypnea spp.	-	-	-		-		-	1.53846	0.0172117	0.331529	0	–	3.79472	0.00140529	1.64835	0.00348926	0.0375099	0	–	0.487224	0.000219677	5.37634	0.018467	0.130376	0	–	1.14412	0.00299789
Hypnea musciformis	6.66667	8.7	26.2	0	–	87.3239	1.49419	10.7692	1.25151	9.32305	0	–	99.8521	0.715274	8.24176	0.315507	2.32104	0	–	27.027	0.0993183	8.60215	0.141995	0.804626	0	–	6.23644	0.0368819
Hypnea spinella	-	-	-		-		-	1.53846	0.0494308	0.533121	0	–	6.09756	0.00403588	0.549451	0.108807	1.46789	0	–	19.9117	0.00228342	1.07527	0.15763	1.5037	0	–	14.502	0.00511787
Hypnea valentiae	-	-	-		-		-	1.53846	0.00293204	0.0313157	0	–	0.321806	0.000239392	1.0989	0.0305825	0.380353	0	–	5.14186	0.00128361	-	-	-		-		-
Jania capillacea	-	-	-		-		-	0.769231	0.0209512	0.236129	0	–	2.7027	0.0008553	1.0989	0.0151036	0.181263	0	–	2.43902	0.00063393	2.15054	0.0448474	0.381703	0	–	3.65631	0.00291217
Jania cubensis	-	-	-		-		-	-	-	-		-		-	1.0989	0.00236718	0.0306799	0	–	0.415904	9.9355e-05	-	-	-		-		-
Jania subulata	-	-	-		-		-	-	-	-		-		-	0.549451	2.95825e-05	0.00039909	0	–	0.0054136	6.20818e-07	-	-	-		-		-
Lomentaria baileyana	-	-	-		-		-	-	-	-		-		-	0.549451	0.0118097	0.159322	0	–	2.84332	0.000247839	2.15054	0.00342172	0.0256423	0	–	0.234926	0.000222189
Polysiphonia spp.	-	-	-		-		-	1.53846	0.00223516	0.0243848	0	–	0.278921	0.000182494	-	-	-		-		-	2.15054	0.000574481	0.00503928	0	–	0.0490304	3.7304e-05
Polysiphonia denudata	-	-	-		-		-	2.30769	0.0336332	0.00606441	0	–	0.0513215	9.43145e-05	1.64835	0.144759	1.9514	0	–	26.4706	0.00911375	-	-	-		-		-
Porphyra rosengurtii	-	-	-		-		-	0.769231	0.0186728	0.229274	0	–	2.62424	0.000762287	1.64835	0.00773616	0.0927524	0	–	1.25375	0.000487053	1.07527	4.04509e-05	0.000385877	0	–	0.0037326	1.31334e-06
Pterocladia sp.	-	-	-		-		-	3.07692	0.141477	1.41056	0	–	32.2182	0.0173268	1.64835	1.24312	10.4032	0	–	98.5419	0.104352	1.07527	0.613022	5.84785	0	–	56.4145	0.0199033
Pterocladia capillacea	-	-	-		-		-	0.769231	0.73207	8.31416	0	–	95.1627	0.0298856	0.549451	0.00214209	0.0288984	0	–	0.392003	4.49539e-05	1.07527	0.000589456	0.00562305	0	–	0.0542299	1.91382e-05
Pterocladiella bartlettii	-	-	-		-		-	0.769231	0.824657	0.0720485	0	–	0.824657	0.000258547	0.549451	0.00102018	0.013763	0	–	0.187003	2.14095e-05	-	-	-		-		-
Rhodymenia pseudopalmata	-	-	-		-		-	7.69231	0.945898	5.81858	0	–	46.2839	0.386148	14.8352	0.444858	2.95842	0	–	31.5604	0.252066	6.45161	0.422778	3.6373	0	–	35.0499	0.0823594
Spyridia filamentosa	-	-	-		-		-	1.53846	0.00919641	0.0754203	0	–	0.745808	0.000750859	0.549451	0.00100349	0.0135378	0	–	0.183638	2.10591e-05	-	-	-		-		-
Yuzurua poiteaui	-	-	-		-		-	7.69231	1.17136	7.27195	0	–	57.4713	0.478189	3.2967	0.0936283	1.17088	0	–	15.873	0.0117893	4.30108	0.0298859	0.205225	0	–	1.82815	0.00388129
Family Gracilariaceae	-	-	-		-		-	4.61538	0.742954	8.36681	0	–	95.7694	0.15165	13.1868	1.23386	7.25674	0	–	54.948	0.647342	12.9032	0.798778	3.85165	0	–	24.4058	0.311212
Unidentified Red Algae spp.	-	-	-		-		-	0.769231	0.0248114	0.290133	0	–	3.32082	0.00105184	1.0989	0.0120321	0.10128	0	–	1.40971	0.000757516	-	-	-		-		-
Brown Algae
Cladosiphon occidentalis	-	-	-		-		-	2.30769	0.731356	8.21375	0	–	94.0157	0.0895695	3.2967	0.611506	7.29301	0	–	98.0402	0.0769983	1.07527	0.00647215	0.0617403	0	–	0.597215	0.000210135
Dictyota menstrualis	-	-	-		-		-	-	-	-		-		-	1.64835	0.213911	1.99786	0	–	19.2132	0.0134674	1.07527	0.0115339	0.110027	0	–	1.06112	0.000374478
Hinksia mitchelliae	-	-	-		-		-	0.769231	0.611995	6.95093	0	–	78.9474	0.0249838	2.1978	0.26579	2.52586	0	–	32.3529	0.0223114	1.07527	0.0662107	0.63161	0	–	6.23669	0.0021497
Padina gymnospora	-	-	-		-		-	8.46154	0.0503554	0.336225	0	–	2.77778	0.0205568	8.79121	0.118883	0.836367	0	–	10.7914	0.0424131	4.30108	0.0951947	0.719609	0	–	6.75079	0.012363
Rosenvingea orientalis	-	-	-		-		-	1.53846	0.0913205	0.73603	0	–	6.60793	0.00745604	-	-	-		-		-	-	-	-		-		-
Sargassum spp.	53.3333	45.9854	34.3476	0	–	99.723	42.2099	42.3077	9.6082	22.0813	0	–	100	21.181	15.9341	2.79201	12.7858	0	–	99.5783	1.75779	17.2043	3.4136	15.3803	0	–	99.5471	1.7733
Sargassum natans	26.6667	46.9326	25.672	0	–	91.2693	12.3474	14.6154	5.50574	19.2772	0	–	95.7244	4.2705	2.74725	0.523131	4.96777	0	–	62.0239	0.0548921	3.22581	0.0777822	0.730123	0	–	7.04225	0.00757619
Sargassum fluitans	26.6667	56.7	32.9	0	–	83.3333	19.3924	10	3.47464	14.4881	0	–	91.5493	1.84401	7.14286	2.9971	14.7278	0	–	99.3789	0.817663	1.07527	0.295964	2.82332	0	–	27.8782	0.00960922
Sargassum filipendula	-	-	-		-		-	0.769231	0.215176	2.44393	0	–	40.9999	0.00878423	1.0989	0.0173867	0.193401	0	–	2.57241	0.000729755	1.07527	0.0817472	0.779819	0	–	7.70015	0.00265413
Animal
Phylum Annelida	-	-	-		-		-	1.53846	0.00042485	0.00462398	0	–	0.0525956	3.46877e-05	6.59341	0.129209	1.35802	0	–	18.8766	0.032539	6.45161	0.0753168	0.460877	0	–	3.99388	0.0146721
Diopatra cuprea	-	-	-		-		-	6.92308	0.648361	3.55475	0	–	29.6465	0.238215	4.94505	0.184511	1.55278	0	–	19.9625	0.0348493	8.60215	0.590735	3.88922	0	–	37.5697	0.153438
Onuphis eremita oculata	-	-	-		-		-	0.769231	0.0233693	0.265424	0	–	3.01464	0.000954017	-	-	-		-		-	-	-	-		-		-
Phylum Arthropoda
Subphylum Crustacea	-	-	-		-		-	0.769231	0.00053458	0.00607166	0	–	0.0697301	2.18234e-05	0.549451	0.000743214	0.0100265	0	–	0.136027	1.55971e-05	-	-	-		-		-
Order Pedunculata	6.66667	0.9	2.7	0	–	8.89507	0.151676	6.15385	0.275209	1.66773	0	–	16.1648	0.0786448	2.1978	0.028344	0.317913	0	–	4.62342	0.00297414	1.07527	1.1823e-05	0.000112784	0	–	0.00108771	3.83863e-07
Infraclass Cirripedia	-	-	-		-		-	0.769231	0.000774729	0.00879923	0	–	0.09994	3.16271e-05	0.549451	0.0813402	1.09734	0	–	14.9058	0.001707	2.15054	0.00240877	0.0229257	0	–	0.221106	0.000156414
Class Insecta	-	-	-		-		-	2.30769	0.0125216	0.141547	0	–	2.44499	0.00153353	2.1978	0.00368926	0.0276818	0	–	0.27068	0.000309691	1.07527	0.00329714	0.0314527	0	–	0.306748	0.00010705
Class Malacostraca
Order Amphipoda	-	-	-		-		-	1.53846	0.00127977	0.0141573	0	–	0.244499	0.000104489	-	-	-		-		-	-	-	-		-		-
Order Decapoda
Family Penaeidae	-	-	-		-		-	-	-	-		-		-	1.0989	0.0840856	1.12453	0	–	15.2542	0.00352924	3.22581	0.300974	2.03355	0	–	18.6522	0.0293156
Family Portunidae	-	-	-		-		-	3.07692	0.0745759	0.607373	0	–	5.74713	0.0121778	2.74725	0.00472714	0.0303181	0	–	0.259924	0.000496019	7.52688	0.0162307	0.0745689	0	–	0.50578	0.0036888
Arenaeus cribrarius	-	-	-		-		-	-	-	-		-		-	-	-	-		-		-	1.07527	0.0149164	0.142294	0	–	1.37275	0.0004843
Callinectes similis	-	-	-		-		-	0.769231	0.0150942	0.171437	0	–	2.2187	0.000616197	-	-	-		-		-	-	-	-		-		-
Libinia spp.	-	-	-		-		-	0.769231	0.000484224	0.00549972	0	–	0.0627392	1.97677e-05	-	-	-		-		-	-	-	-		-		-
Portunus gibbesii	6.66667	0	0.104007	0	–	0.416956	0.0071098	-	-	-		-		-	-	-	-		-		-	-	-	-		-		-
Order Mysida
Mysidopsis sp.	-	-	-		-		-	0.769231	1.8969e-05	0.000215447	0	–	0.00246828	7.74381e-07	0.549451	0.000295825	0.0039909	0	–	0.054136	6.20818e-06	-	-	-		-		-
Phylum Bryozoa	-	-	-		-		-	17.6923	0.820242	8.80287	0	–	100	0.736673	20.3297	0.0167673	0.062377	0	–	0.496278	0.0133714	22.5806	0.0765956	0.440199	0	–	4.08998	0.0522243
Phylum Cnidaria	6.66667	0.1	0.179456	0	–	0.719424	0.00891193	2.30769	0.0200201	0.164873	0	–	1.80832	0.00245186	4.94505	0.281073	3.23479	0	–	44.2853	0.0530873	2.15054	0.039168	0.276859	0	–	2.39433	0.00254338
Class Anthozoa
Subclass Hexacorallia
Order Scleractinia	-	-	-		-		-	-	-	-		-		-	0.549451	0.0010281	0.0138699	0	–	0.188143	2.15758e-05	-	-	-		-		-
Subclass Octocorallia	-	-	-		-		-	-	-	-		-		-	0.549451	0.0171428	0.231269	0	–	3.13761	0.000359759	-	-	-		-		-
Class Hydrozoa	-	-	-		-		-	11.5385	0.134529	0.878328	0	–	11.7647	0.0823794	6.59341	0.0111207	0.0690546	0	–	0.597639	0.00280056	16.129	0.0699609	0.332719	0	–	3.14557	0.0340719
Physalia physalis	-	-	-		-		-	6.15385	1.761	9.18564	0	–	77.459	0.503231	2.74725	0.231691	2.92341	0	–	39.6268	0.0291736	4.30108	0.00248967	0.0133603	0	–	0.108382	0.000323334
Class Scyphozoa	6.66667	6.3	14	0	–	31.25	0.534716	3.84615	0.520102	2.92072	0	–	21.0526	0.106162	1.64835	0.0245288	0.30026	0	–	4.05405	0.00154428	2.15054	0.0990477	0.902204	0	–	8.79346	0.00643167
Order Actiniaria	-	-	-		-		-	1.53846	0.00187887	0.0171988	0	–	0.193911	0.000153404	3.2967	0.142894	1.13903	0	–	13.1811	0.0179926	1.07527	0.0144772	0.138103	0	–	1.3319	0.000470038
Order Rhizostomeae
Stomolophus meleagris	-	-	-		-		-	-	-	-		-		-	0.549451	0.00237065	0.0319818	0	–	0.433829	4.97504e-05	1.07527	0.00139902	0.0133458	0	–	0.12871	4.54229e-05
Phylum Chordata
Infraclass Teleostei	13.3333	3	10.6	0	–	41.0959	1.55699	4.61538	0.332144	2.18228	0	–	22.2309	0.0677964	6.04396	0.676832	4.45474	0	–	37.5114	0.170448	7.52688	0.996977	8.43675	0	–	81.2274	0.226586
Hippocampus sp.	-	-	-		-		-	-	-	-		-		-	-	-	-		-		-	2.15054	0.0029921	0.0230069	0	–	0.213904	0.000194292
Avian feathers	6.66667	0.0277008	0.069098	0	–	0.277008	0.00473986	15.3846	0.0832938	0.465034	0	–	4.66125	0.0680068	6.59341	0.00468213	0.0298712	0	–	0.361664	0.00117911	5.37634	0.00400064	0.0199965	0	–	0.167645	0.000649454
Phylum Ctenophora	-	-	-		-		-	0.769231	0.0997034	1.13241	0	–	19.5599	0.00407024	-	-	-		-		-	-	-	-		-		-
Phylum Mollusca	13.3333	2.27483	6.74011	0	–	32.6241	0.778488	36.9231	6.4176	17.5329	0	–	93.4878	12.3135	38.4615	2.32872	7.52094	0	–	76.9493	3.4698	36.5591	3.39469	10.6703	0	–	71.8814	3.74739
Class Bivalvia
Genus Corbula	-	-	-		-		-	-	-	-		-		-	1.0989	0.134077	1.58604	0	–	21.2853	0.00562747	-	-	-		-		-
Class Cephalopoda
Octopus vulgaris	-	-	-		-		-	-	-	-		-		-	0.549451	0.0467206	0.630296	0	–	8.54987	0.000980478	-	-	-		-		-
Class Gastropoda	-	-	-		-		-	3.84615	0.223375	2.20775	0	–	25	0.0455946	3.84615	0.0170184	0.120056	0	–	1.07536	0.00250003	8.60215	0.344112	1.99221	0	–	16.6141	0.0893799
Anachis sp.	-	-	-		-		-	-	-	-		-		-	0.549451	0.000370153	0.00499364	0	–	0.0677725	7.76803e-06	-	-	-		-		-
Astyris lunata	-	-	-		-		-	-	-	-		-		-	0.549451	0.00012447	0.00167919	0	–	0.0231524	2.61212e-06	-	-	-		-		-
Crepidula fornicata	-	-	-		-		-	-	-	-		-		-	0.549451	0.00099576	0.0134335	0	–	0.185219	2.0897e-05	-	-	-		-		-
Diacavolinia longirostris	-	-	-		-		-	0.769231	0.00124629	0.0141552	0	–	0.244499	5.0878e-05	-	-	-		-		-	-	-	-		-		-
Murex sp.	-	-	-		-		-	0.769231	0.000484224	0.00549972	0	–	0.0627392	1.97677e-05	-	-	-		-		-	-	-	-		-		-
Nassarius acutus	-	-	-		-		-	-	-	-		-		-	0.549451	0.00037341	0.00503758	0	–	0.0694573	7.83637e-06	-	-	-		-		-
Phrontis vibex	-	-	-		-		-	0.769231	0.00280664	0.0318773	0	–	0.442087	0.000114577	-	-	-		-		-	-	-	-		-		-
Class Scaphopoda
Graptacme eborea	-	-	-		-		-	0.769231	0.00124629	0.0141552	0	–	0.244499	5.0878e-05	-	-	-		-		-	-	-	-		-		-
Phylum Echinodermata
Class Holothuroidea
Allothyone mexicana	-	-	-		-		-	-	-	-		-		-	0.549451	0.00920721	0.124212	0	–	1.68492	0.000193222	-	-	-		-		-
Class Echinoidea
Mellita quinquiesperforata	-	-	-		-		-	0.769231	0.0407858	0.463238	0	–	5.26137	0.00166502	1.0989	0.0153687	0.173545	0	–	2.35479	0.000645054	2.15054	0.0381815	0.264426	0	–	2.20278	0.00247932
Class Ophiuroidea	6.66667	0.953846	2.86154	0	–	9.53846	0.163212	-	-	-		-		-	-	-	-		-		-	1.07527	0.00041614	0.00396972	0	–	0.0382848	1.3511e-05
Phylum Porifera
Class Demospongiae	-	-	-		-		-	0.769231	1.37239e-05	0.000155873	0	–	0.00177038	5.60257e-07	11.5385	0.916263	6.75033	0	–	85.6895	0.403802	17.2043	1.6553	6.38238	0	–	48.71	0.859896
Leptogorgia sp.	-	-	-		-		-	6.92308	0.0362214	0.324675	0	–	4.41176	0.0133081	4.94505	0.0063108	0.0555301	0	–	0.710594	0.00119195	4.30108	0.0160455	0.0891587	0	–	0.715746	0.00208383
Class Calcarea	-	-	-		-		-	-	-	-		-		-	0.549451	0.000803273	0.0108368	0	–	0.147622	1.68575e-05	2.15054	1.00191	9.54557	0	–	92.0608	0.0650591
Unidentified animal	6.66667	0.470914	1.41274	0	–	4.7255	0.0805777	3.07692	0.0137853	0.0843585	0	–	0.792393	0.00225105	5.49451	0.0540015	0.547319	0	–	7.32108	0.0113328	10.7527	0.50239	3.06826	0	–	25.7754	0.163114
Unidentified animal egg mass	6.66667	0.188266	0.564799	0	–	2.14207	0.0322141	2.30769	0.00413853	0.0367628	0	–	0.402739	0.000337899	0.549451	0.000237231	0.00303232	0	–	0.00233754	9.95704e-06	2.15054	0.00515554	0.0386186	0	–	0.353707	0.000334776
Anthropogenic debris												-
Misc. anthropogenic debris	60	12.1552	14.9545	0	–	39.6694	4.49161	8.46154	0.773748	3.74324	0	–	26.087	0.347458	3.84615	0.831832	3.46184	0	–	14.2857	0.907754	3.22581	1.04977	4.7695	0	–	1.47059	0.783916
Fishing line	6.66667	0.00508828	0.0144413	0	–	0.0578938	0.000870651	7.69231	0.0248064	0.1522	0	–	1.44372	0.0101268	8.79121	0.0213775	0.114583	0	–	1.01771	0.00717806	10.7527	0.171981	1.42721	0	–	21.1616	0.0558381
Plastic debris	40	29.425	18.4638	0	–	64.3836	12.8119	35.3846	3.22807	8.16359	0	–	81.7313	5.93015	18.1319	0.532429	3.05237	0	–	46.3324	0.379901	13.9785	0.7603	3.64769	0	–	37.0885	0.320906
Laytex balloons	-	-	-		-		-	10	0.525965	2.91921	0	–	40.1558	0.279132	1.0989	0.0102771	0.1361	0	–	1.90995	0.00043135	1.07527	0.0104683	0.099861	0	–	1.00587	0.000339879
Styrofoam	6.66667	0.719424	0.179456	0	–	0.719424	0.00891193	1.53846	0.0358192	0.291822	0	–	3.84615	0.00292453	1.0989	0.000487278	0.00645019	0	–	0.092081	2.0452e-05	2.15054	0.0672848	0.617121	0	–	6.65311	0.00436914
Tar fragments	20	3.89591	2.73226	0	–	10.9929	0.422521	8.46154	0.0877456	0.651877	0	–	10.1546	0.0394029	1.64835	0.0182088	0.224413	0	–	3.28113	0.00114639	1.07527	0.000346894	0.00330915	0	–	0.0319244	1.12628e-05
Nylon/fiber	-	-	-		-		-	5.38462	0.0314847	0.214893	0	–	3.97542	0.00899719	3.84615	0.0446939	0.499419	0	–	7.56552	0.00656562	1.07527	0.00634298	0.0605082	0	–	0.804682	0.000205941
Masking tape	-	-	-		-		-	-	-	-		-		-	-	-	-		-		-	1.07527	0.0061065	0.0582523	0	–	0.586756	0.000198263
Rubber	-	-	-		-		-	3.07692	0.0300146	0.172493	0	–	1.47059	0.00490121	1.0989	0.0286004	0.291462	0	–	3.92047	0.00120042	2.15054	0.00839764	0.0569926	0	–	0.446917	0.000545301
Rope	-	-	-		-		-	2.30769	0.000798687	0.00821452	0	–	0.0942196	6.52103e-05	-	-	-		-		-	-	-	-		-		-
Aluminium	6.66667	1.36986	0.341704	0	–	1.36986	0.0141412	0.769231	0.00157113	0.0178446	0	–	0.211775	6.41388e-05	1.0989	0.00178402	0.0206445	0	–	0.298285	7.48788e-05	1.07527	4.25482e-05	0.000405884	0	–	0.0039163	1.38143e-06
Charcoal	6.66667	6.02837	1.50374	0	–	6.02837	0.0711211	-	-	-		-		-	-	-	-		-		-	1.07527	0.00120239	0.01147	0	–	0.110619	3.90385e-05
Other diet items												-
Spartina alterniflora	-	-	-		-		-	-	-	-		-		-	1.0989	0.315904	4.2132	0	–	58.6469	0.0132591	-	-	-		-		-
Eichhornia crassipes	6.66667	0.00578938	0.00144413	0	–	0.00578938	8.70651e-05	13.8462	1.5051	9.34375	0	–	100	1.10598	10.989	0.461467	3.70637	0	–	47.3576	0.193687	9.67742	0.974862	5.42209	0	–	44.5275	0.284862
Terrestrial plant matter	-	-	-		-		-	8.46154	0.753522	4.84538	0	–	40.2425	0.338375	8.24176	1.3946	9.00461	0	–	94.6919	0.439006	8.60215	0.843038	4.81458	0	–	43.1825	0.218971
Wood fragments	6.66667	0.972898	0.242683	0	–	0.972898	0.0165895	8.46154	0.150671	0.774786	0	–	8.13481	0.0676601	4.3956	0.303045	3.69117	0	–	49.9624	0.0508775	5.37634	0.0501571	0.474302	0	–	4.77787	0.00814239
Rock	-	-	-		-		-	3.07692	0.09413	0.780726	0	–	8.7668	0.0153709	1.0989	0.0210872	0.221404	0	–	3.05742	0.000885072	2.15054	0.379293	3.55719	0	–	34.3187	0.0246294
Sea bean	-	-	-		-		-	9.23077	1.06101	5.21161	0	–	38.7201	0.519771	3.2967	0.0484759	0.490599	0	–	6.55977	0.00610389	4.30108	0.143258	1.16998	0	–	11.1729	0.018605
Unidentified diet item	6.66667	0.138985	0.0346691	0	–	0.138985	0.00236993	6.92308	0.760515	5.55662	0	–	45.9621	0.194756	1.64835	0.00820166	0.0711536	0	–	0.747049	0.00051636	3.22581	0.0113742	0.068341	0	–	0.565931	0.00110788
